# Supplementary material
Source: MDPI journal article supplement (https://www.mdpi.com/2227-9717/9/10/1710)
Supplement: s1 [file s1]

Supplementary document:

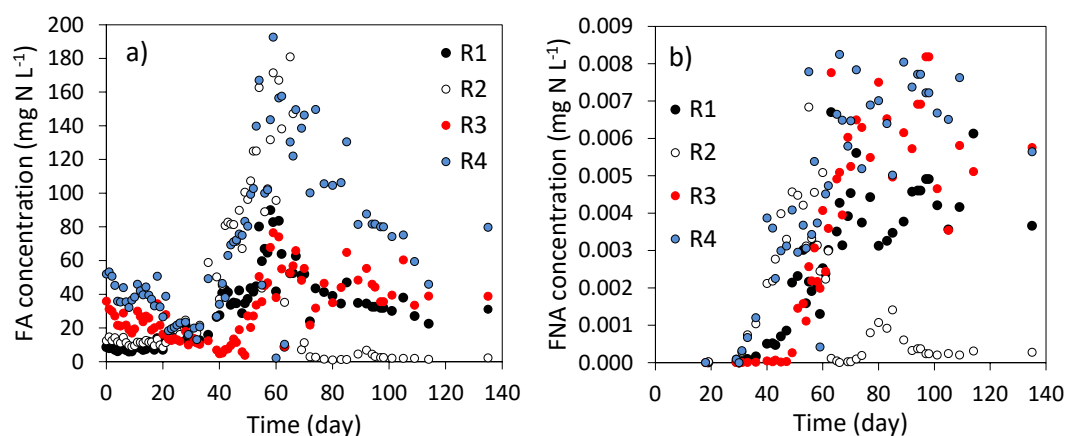

Figure S1. Concentrations of free ammonia (FA) (a) and free nitrous acid (FNA) (b) over the operation time with the increased influent  $\text{NH}_4^+\text{-N}$  concentration.

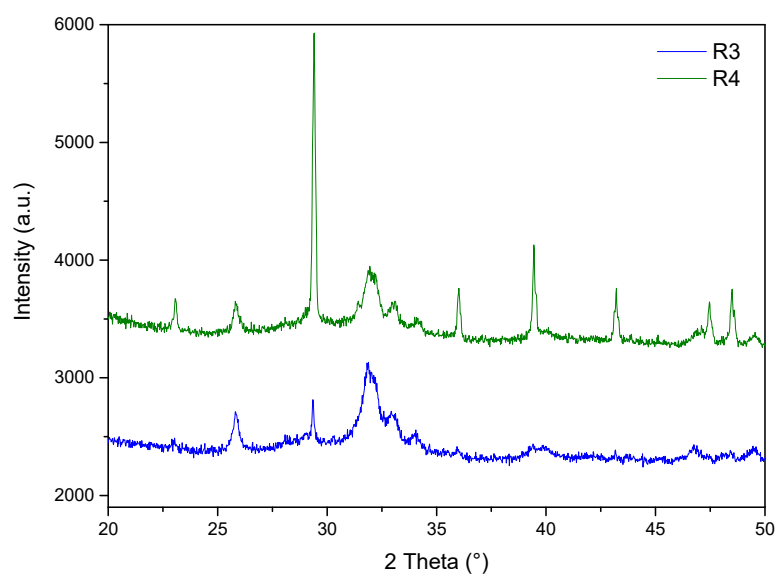

Figure S2 The inorganic solid phases present within granules from R3 and R4 on day 121 by XRD analysis.
